# Supplementary material for: Ikaros interacts with P-TEFb and cooperates with GATA-1 to enhance transcription elongation
Source: PubMed Central journal article supplement — Nucleic Acids Res. 2011 Jan 17;39(9):3505–19. doi: 10.1093/nar/gkq1271 (PMC3089448; doi:10.1093/nar/gkq1271), 2011-01-17
Supplement: supp_gkq1271_Supplementary_Material_Bottardi_et_al_2010.pdf [file supp_gkq1271_Supplementary_Material_Bottardi_et_al_2010.pdf]

## Supplementary Figure S1: Primer set sequences

### For ChIP assays

Mouse CD4 enhancer 1 region

M-CD4-1 F:GGCCTAGATTTCCCTTCTGAG

M-CD4-1 R: TACTTTCTGTGACTTACAAAGGC

Mouse GPA promoter

M-GPA pr F: GTCCTCGCAGTTATGCAGACC

M-GPA pr R: AGCCAATGTGTGTCAACGGA

Mouse THP promoter

M-THP pr F: GGTGGATGGTGTGGTCACAAC

M-THP pr R: GGTCTTGACACACCAGCTTT

Mouse HS2

M-HS2 F: CCTTGCCTGTTCCCTGCTCA

M-HS2 R: CACATGTGACCTGTCTGCCAG

Mouse  $\beta$  major promoter

M-beta maj pr F: CAGTGAGTGGCACAGCATCC

M-beta maj pr R: CAGTCAGGTGCACCATGATGT

Human HS3

H-HS3 F: ACCAGCTATCAGGGCCCAGA

H-HS3 R:AATGCTGCTATGCTGTGCCTC

Human HS2

H-HS2 F: CCTCCCATAGTCCAAGCATGA

H-HS2 R: GTGCTTGAGCCAGAAGGTTTG

Human  $\epsilon$  promoter

H-epsilon pr F: TTTGGAAGATGATGAAGAGGG

H-epsilon pr R: GCTGTGTCGGAAGCAGATATG

Human  $\gamma$  promoter

H-gamma pr F: GCCTTGACCAATAGCCTTGACA

H-gamma pr R: GAAATGACCCATGGCGTCTG

Human  $\gamma$  gene

H-gamma gene F: CCTTGGGAGATGCCATAAAGC

H-gamma gene R: TCAAACAGCTCACACCCTGC

Human  $\beta$  promoter

H-beta pr F: GGCTGTCATCACTTAGACCTC

H-beta pr R: GGTTGCTAGTGAACACAGTTG

Human  $\delta$  promoter

H-delta pr F: GGGCAAGTTAAGGGAAGAGTGG

H-delta pr R: GTGTCTGTTTGAGGTTGCTAGTGA

Mouse Gata-2 -2.8 region: Gras , JA et al. (2003) PNAS 100; 8811-8816.

**For RTqPCR assays**

Mouse Ikaros cDNA

M-Ik RT F: AACCTGAAAGACAATGGATGTCGATGAGG

M-Ik RT R: AGTGGGGCCTGGCTGGGTTTAGC

Mouse Actin cDNA

M-Actin RT F: ATCGTGGGCCCGCCCTAGGCACCA

M-Actin RT R: TCCATGTCGTCCCAGTTGGTAACAA

Mouse Gpa cDNA

M-GPA RT F: GCCGAATGACAAAGAAAAGTTCA

M-GPA RT R: TCAATAGAACTCAAAGGCACACTGT

Mouse Gata-1 cDNA

M-GATA-1 RT F: GCCCCTTGTGAGGCCAGAGAG

M-GATA-1 RT R: CGCTCCAGCCAGATTTCGACCC

Mouse Scl/Tal-1 cDNA

M-Scl RT F: TCCCCATATGAGATGGAGATTT

M-Scl RT R: ATTGATGTACTTCATGGCAAGG

Mouse Mi-2 cDNA

M-Mi-2 RT F: CAAGCGGAAGCCACGCCTGA

M-Mi-2 RT R: GCGAGAACCACGGCCGAACA

Mouse Brg1 cDNA

M-BRG1 RT F: CAAGCGGAAGCCCCTGA

M-BRG1 RT R: GCGAGAACCACGGCCGAACA

Mouse Gata-2 cDNA

M-GATA-2 RT F: GCCAGAAGAGCGGGCACCTG

M-GATA-2 RT R: AGAGGCCACAGGCGTTGCAC

Mouse Fog-1 cDNA

M-FOG-1 RT F: AGCAGCCTGTCCACTTTCAT

M-FOG-1 RT R: AAGTGTC AAGGGTCCTGGTG

Mouse EkLF cDNA

M-EKLF RT F: ACCACCCTGGGACAGTTTCT

M-EKLF RT R: GAAGGGTCCTCCGATTCAG

Mouse  $\zeta$ -globin cDNA

M-zeta RT F: GCGAGCTGCATGCCTACAT

M-zeta RT R: GCCATTGTGACCAGCAGACA

Mouse  $\epsilon$ y cDNA

M- $\epsilon$ y RT F: CAAGCTACATGTGGATCCTGAGAA

M- $\epsilon$ y RT R: TGCCGAAGTGACTAGCCAAA

Mouse  $\beta$ h1 cDNA

M- $\beta$ h1 RT F: AGGCAGCTATCACAAGCATCTG

M- $\beta$ H1 RT R: AACTTGTCAAAGAATCTCTGAGTCCAT

Mouse  $\beta$ maj/min cDNA

M- $\beta$ maj RT F: GGTGGTCTACCCTTGGACCC

M- $\beta$ maj RT R: GATACTTGTGGGCCAGGGCA

Human  $\epsilon$  cDNA

Hu- $\epsilon$  RT-F: AGGAGAAGGCTGCCGTCCT

Hu- $\epsilon$  RT-R: AGGGAGACGACAGGTTTCCA

Human  $\gamma$  cDNA

Hu- $\gamma$  RT-F: CATTTCACAGAGGAGGACAA

Hu- $\gamma$  RT-R: GTAGACAACCAGGAGCCTT

Qiagen QuantiTect probes (FAM-labelled): GTGGAAGATGCTGGAGG

Human  $\beta$  cDNA

Hu $\beta$ RT-F: CTCGGTGCCTTTAGTGATGG

Hu $\beta$ RT-R: ACACAGACCAGCACGTTG

IDT PrimeTime<sup>TM</sup> probe (FAM-labelled): CTTGAGGTTGTCCAGGTGAGCCA

Human  $\gamma$  primary start

Hu- $\gamma$  start F: CCTAGTCCAGACGCCATGGGTC

Hu- $\gamma$  start R: TCACCAGAGCCTACCTTCCCAGGG

Human  $\gamma$  primary end

Hu- $\gamma$  end F: TCTGGGTGGAAGCTTGGTG

Hu- $\gamma$  end R: ACCAGCACATTTCCCAGGAG

Mouse primary gapdh

Mo-gapdh F: GAAGGTTGGTGTGAACGGATTT

Mo-gapdh R: GAATTTGCCATGGGTGGAGT

**For 3C assay**

LCR- $\epsilon$

3C-LCR: ATAGCTTGTCTATTTCTCTCTCTAACATAGTTG

3C-hu $\epsilon$ : AGAAACATAGGAAGAACCAAGAGCTT

LCR-i $\epsilon$ /G $\gamma$

3C-LCR: ATAGCTTGTCTATTTCTCTCTCTAACATAGTTG

3C-i $\epsilon$ /G $\gamma$ : GGCAGATAACTGGTTGGTGAATT

LCR-A $\gamma$

3C-LCR: ATAGCTTGTCTATTTCTCTCTCTAACATAGTTG

3C-A $\gamma$ : TTCTCTGAAAGTGATCCATGATCTCT

LCR- $\beta$

3C-LCR: ATAGCTTGTCTATTTCTCTCTCTAACATAGTTG

3C- $\beta$ : CATGTCCCATCCAGGTGATG

| <b>Antibody</b>                       | <b>Application</b>  | <b>Provider</b>         | <b>Cat #</b> |
|---------------------------------------|---------------------|-------------------------|--------------|
| GATA-1                                | ChIP, WB, IP,<br>IF | SantaCruz Biotechnology | N6           |
| GATA-1                                | WB, IP              | SantaCruz Biotechnology | M20          |
| BRG1                                  | ChIP, WB, IP        | SantaCruz Biotechnology | H88          |
| Ikaros                                | ChIP, WB            | SantaCruz Biotechnology | E20          |
| Ikaros                                | ChIP, WB            | Abcam                   | ab26083      |
| FOG-1                                 | ChIP                | SantaCruz Biotechnology | M20          |
| Mi-2                                  | ChIP, WB, IP        | SantaCruz Biotechnology | H242         |
| P45/NF-E2                             | ChIP                | SantaCruz Biotechnology | C19          |
| TBP                                   | ChIP                | SantaCruz Biotechnology | SI1          |
| Pol II                                | ChIP                | SantaCruz Biotechnology | N20          |
| GATA-2                                | ChIP                | SantaCruz Biotechnology | CG296        |
| Cdk9                                  | ChIP, WB, IP,<br>IF | SantaCruz Biotechnology | C20          |
| Ser2 phosphorylated Pol II<br>(PCTD)  | ChIP                | Covance                 | H5           |
| Anti-FLAG-conjugated agarose<br>beads | IP                  | Sigma                   | A2220        |
| Anti-hemagglutinin (anti-HA)          | WB, IF              | SantaCruz Biotechnology | Y11, F7      |
| Actin                                 | WB                  | Labvision corporation   | ACTN05       |
| Mouse anti-HA                         | IF                  | SantaCruz Biotechnology | F7           |
| Mouse anti-Ape1                       | IF                  | R&D Systems             | MAB1044      |

ChIP: Chromatin Immunoprecipitation

WB: Western Blot

IP: Protein immunoprecipitation

IF: Immunofluorescence

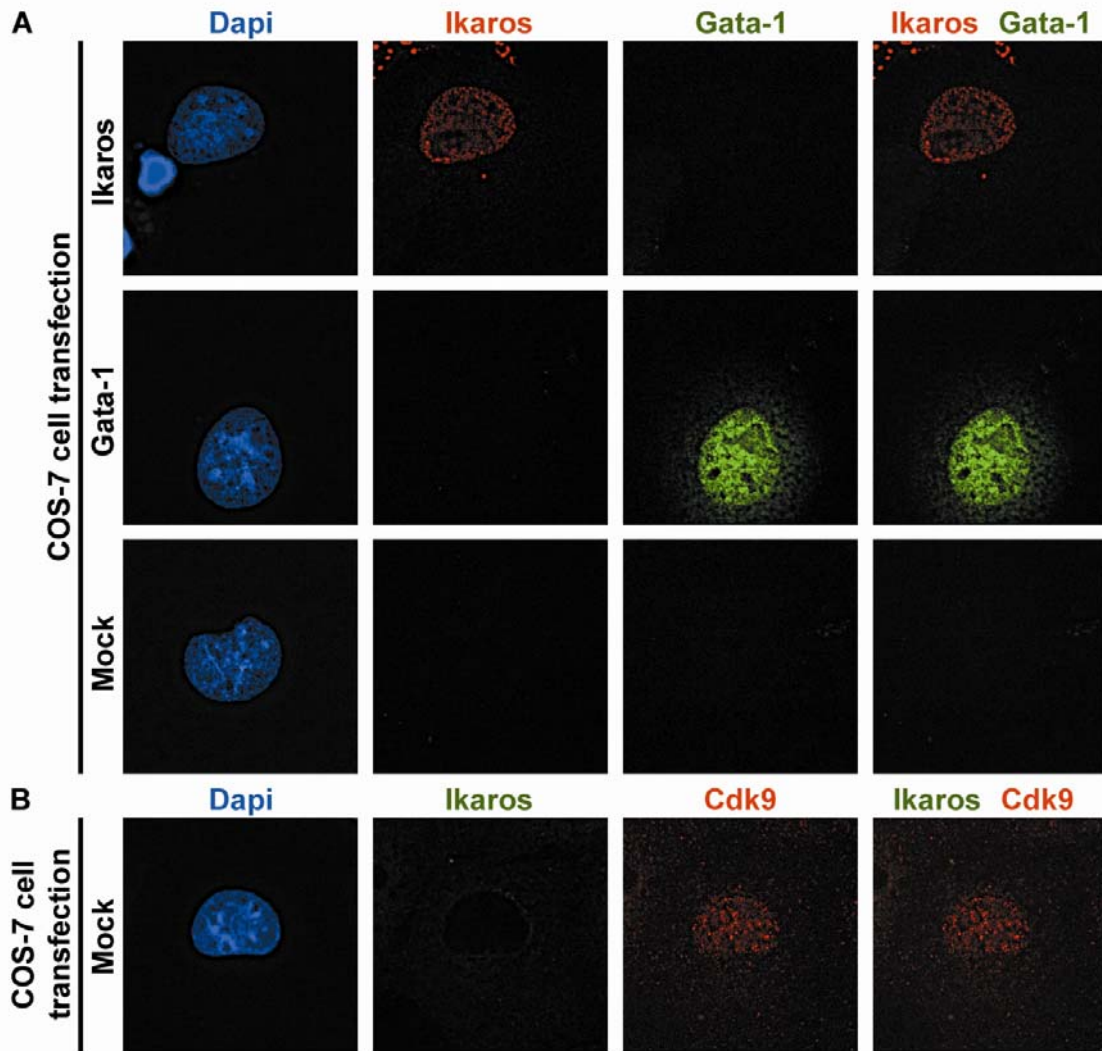

**Supplementary Fig. S2. Deconvolution immunofluorescence of COS-7 transfected cells: A)** COS-7 cells expressing Flag/HA-Ikaros (Ikaros) or Gata-1 or empty vector (Mock) were stained with mouse antibodies to the HA tag and with rat antibodies to Gata-1; the secondary staining was carried out with TR-conjugated anti-mouse as well as FITC-conjugated anti-rat antibodies; single COS-7 cells are shown where Ikaros is detected as red signals and Gata-1 as green signals; **B)** COS-7 cells transfected with empty vector (Mock) were stained with mouse antibodies to the HA tag; the secondary staining was carried out with FITC-conjugated anti-mouse antibodies; a representative COS-7 cell is shown to demonstrate undetectable levels of green signals in Mock-transfected cells.



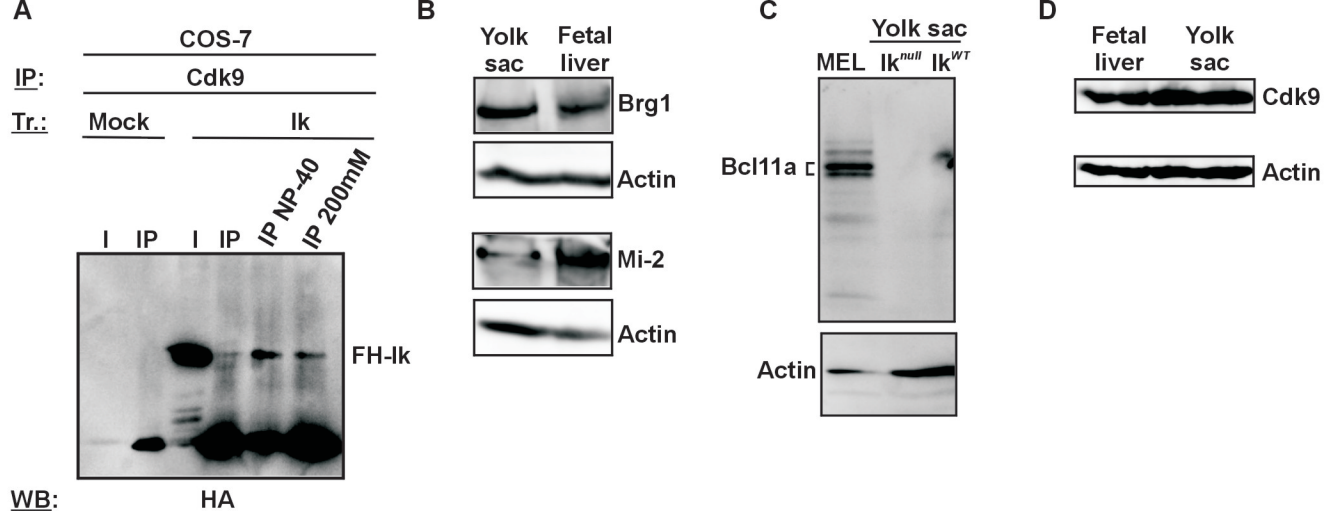

**Supplementary Fig. S3. A) Ikaros-Cdk9 interaction:** protein co-IP of total cell lysates prepared from COS-7 cells transfected (Tr) with empty vector (Mock) or Flag/HA-Ikaros Ikaros (FH-Ik); cell lysates were immunoprecipitated with Cdk9 antibodies or isotype-matched Ig (Ig) and WB were carried out with anti-HA antibodies; IP NP-40: lysis buffer containing 1% NP-40; IP 200mM: lysis buffer containing 200mM NaCl; **B, C, D) Representative examples of Western Blot (WB) assays performed on equal number of EryC:** total cell lysates were resolved on SDS-PAGE and immunoblots were probed with Brg1, Mi-2, Bcl11a, Cdk9 or Actin (used as a loading control) antibodies; Brg1, Mi2, Bcl11a, Cdk9 and Actin specific bands are indicated on the side of each panel.
